# Supplementary material for: Sc3N@C80 and La@C82 doped graphene for a new class of optoelectronic devices
Source: Royal Society of Chemistry journal article supplement (doi:10.1039/c9tc06145b), 2020-01-01
Supplement: c9tc06145b1.pdf [file c9tc06145b1.pdf]

## Supplementary Information

### Sc<sub>3</sub>N@C<sub>80</sub> and La@C<sub>82</sub> Doped Graphene for a New Class of Optoelectronic Devices

*Kishan Jayanand<sup>1+</sup>, Srishti Chugh<sup>1,2+</sup>, Nirmal Adhikari<sup>3</sup>, Misook Min<sup>1</sup>, Luis Echegoyen<sup>4\*</sup>, and Anupama B. Kaul<sup>1,5\*</sup>*

<sup>1</sup>Department of Materials Science and Engineering, PACCAR Technology Institute, University of North Texas, Denton, TX 76203, U.S.A.

<sup>2</sup>Department of Metallurgical, Materials and Biomedical Engineering, University of Texas at El Paso, El Paso, TX 79968, U.S.A.

<sup>3</sup>Department of Electrical Engineering, <sup>4</sup>Department of Chemistry, University of Texas at El Paso, El Paso, TX 79968, U.S.A.

<sup>5</sup>Department of Electrical Engineering, University of North Texas, Denton, TX 76203, U.S.A.

<sup>+</sup>These authors contributed equally to the work

<sup>\*</sup>Corresponding Author Email: [anupama.kaul@unt.edu](mailto:anupama.kaul@unt.edu); [echegoyen@utep.edu](mailto:echegoyen@utep.edu)

#### Electrophoretic Deposition of END<sub>1</sub>

Dispersions of END<sub>1</sub> (~ 0.01 mg, ~ 0.5 mg, and ~ 1 mg) exhibited optical absorption spectra in ~ 1 mL of o-DCB shown in Figure S1(a). Since endohedral fullerenes have low solubility in toluene, o-DCB was used for the dissolution of END<sub>1</sub>.<sup>[1]</sup> END<sub>1</sub> suspensions shows a relatively high absorbance for  $\lambda \sim 450\text{-}680\text{ nm}$ , consistent with previous reports.<sup>[2]</sup> As the concentration of END<sub>1</sub> in o-DCB was increased, the absorption of END<sub>1</sub> also increased, consistent with the Lambert-Beer Law. Electrophoretic deposition was used to adhere END<sub>1</sub> on the substrate, similar to the technique reported for depositing C<sub>60</sub> films,<sup>[3]</sup> where the current  $I$  as a function of the electrophoretic deposition time  $t$  is shown in Figure S1(b). A drop of the suspension was injected at voltage  $V \sim 0\text{ V}$  and a step potential was applied from ~ 0.05 V to ~ 0.3 V in ~ 0.05 V increments between the electrodes. The electrophoretic deposition  $I$  increased gradually as the step-potential increased with time for END<sub>1</sub>. Upon saturation for a particular step  $V$ ,  $I$  starts to decrease due to Joule heating as the resistance increases. After  $t \sim 12\text{ min}$  of deposition, a film of END<sub>1</sub> adhered on top of the Au/Ti electrodes. Eventually, the device was vacuum annealed for ~ 24 hours at ~ 180°C to drive off the residual solvents (i.e. at the approximate

boiling temperature of o-DCB). Prior to the fabrication of the END<sub>1</sub>-graphene hybrid devices, reference measurements were conducted for END<sub>1</sub> in ~1 mL of o-DCB to gauge the optimal concentration needed of the END<sub>1</sub> in the construction of the graphene hybrid devices.

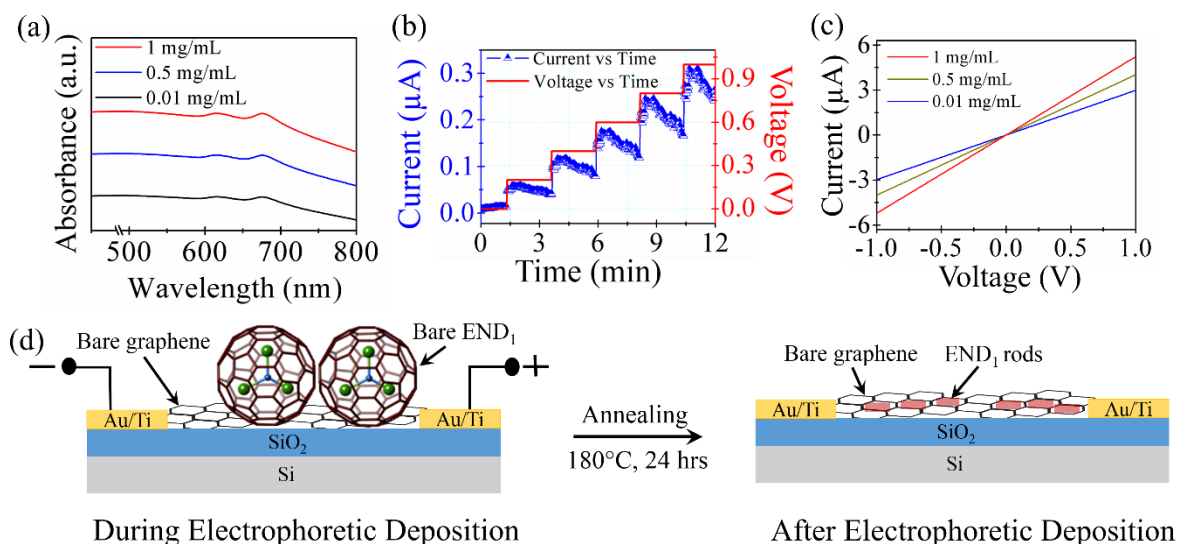

**Figure S1:** (a) Optical absorbance at various concentrations of END<sub>1</sub> as a function of  $\lambda$ . (b) Current measurements as a function of electrophoretic deposition time. (c)  $I$ - $V$  of END<sub>1</sub> at various concentrations in o-DCB. (d) Schematic illustration for the electrophoretic deposition of END<sub>1</sub> on the graphene membrane. The graphene was mechanically exfoliated and Au/Ti electrical contacts were deposited followed by a lift-off process using SiO<sub>2</sub>/Si substrate (schematic not to scale). For electrophoretic deposition, a ~ 1 mg suspension solution of END<sub>1</sub> in ~ 1 mL of o-DCB was used. During electrophoretic deposition, individual atoms of END<sub>1</sub> aggregated on top of the graphene membrane, but after annealing the hybrid for ~ 24 hrs at ~ 180 °C, END<sub>1</sub> aligns itself in the form of a rod-shaped crystal as shown schematically in the right image of (d).

The  $I$ - $V$  Characteristic of bare END<sub>1</sub> films deposited on SiO<sub>2</sub>/Si substrates for concentrations ~ 0.01 mg/mL, ~ 0.5 mg/mL and ~ 1 mg/mL under vacuum conditions are shown in Figure S1(c) from ~ -1 V to ~ 1 V. Since the ~ 1 mg/mL concentration of END<sub>1</sub> yielded the highest  $I$  values in o-DCB, this concentration was used to electrophoretically deposit the END<sub>1</sub> on top of the graphene membrane. Figure S1(d) shows a schematic depiction of the hybrid structure of END<sub>1</sub> aggregated on top of the graphene membrane, where the

aggregated film consists of individual END<sub>1</sub> molecules. However, after annealing the hybrid devices, END<sub>1</sub> aligns itself in the form of a rod-shaped crystal, as shown in Figure S1(d)-right. The END<sub>1</sub> molecules nucleate rapidly and then the crystal seeds start to grow via  $\pi$ - $\pi$  stacking to form small particles where the growth of END<sub>1</sub> occurs along the long-axis and the crystals adopt a rod-shaped morphology,<sup>[2]</sup> as confirmed using SEM.

### **SEM and AFM Imaging Analysis END<sub>1</sub>**

SEM measurements were conducted to see the agglomeration of END<sub>1</sub> on top of graphene membrane. Figures S2(a)-(d) show typical SEM images of END<sub>1</sub> ((a) and (c)) and END<sub>1</sub>-graphene ((b) and (d)), where the top-left inset of Figure S2(b) shows the bare graphene device only. The average length of END<sub>1</sub> rod-shaped ensembles after electrophoretic deposition was found to be  $\sim 4 \mu\text{m}$  as shown in Figure S2(c) and (d). More insights into the structural morphology was obtained using AFM conducted at a scan speed of 1 Hz. The height profile measurements were performed over an area of  $\sim 15 \mu\text{m} \times 15 \mu\text{m}$ , as shown in Figure S2(e)-(i). The height profile from Figure S2(e)-(i) (red dotted lines) is reproduced in Figure S2(e)-(ii) which reveals the relatively smooth surface of the bare graphene membrane, where the inset shows the height profile of bare graphene with 24 nm thickness. Similar AFM measurements were performed for bare END<sub>1</sub> and END<sub>1</sub>-graphene hybrid structures, as shown in Figures S2(f) and (g), respectively. Figures S2(f)(i)-(ii) illustrate the clusters of bare END<sub>1</sub> in the form of islands exhibiting a peak height of  $\sim 3.6 \text{ nm}$  and diameter  $\sim 50 \text{ nm}$ ; Figures S2(g)(i)-(ii) on the other hand, show clustering of END<sub>1</sub> on the graphene surface with a peak height of  $\sim 9\text{-}20 \text{ nm}$  and cluster diameter  $\sim 200\text{-}350 \text{ nm}$ .

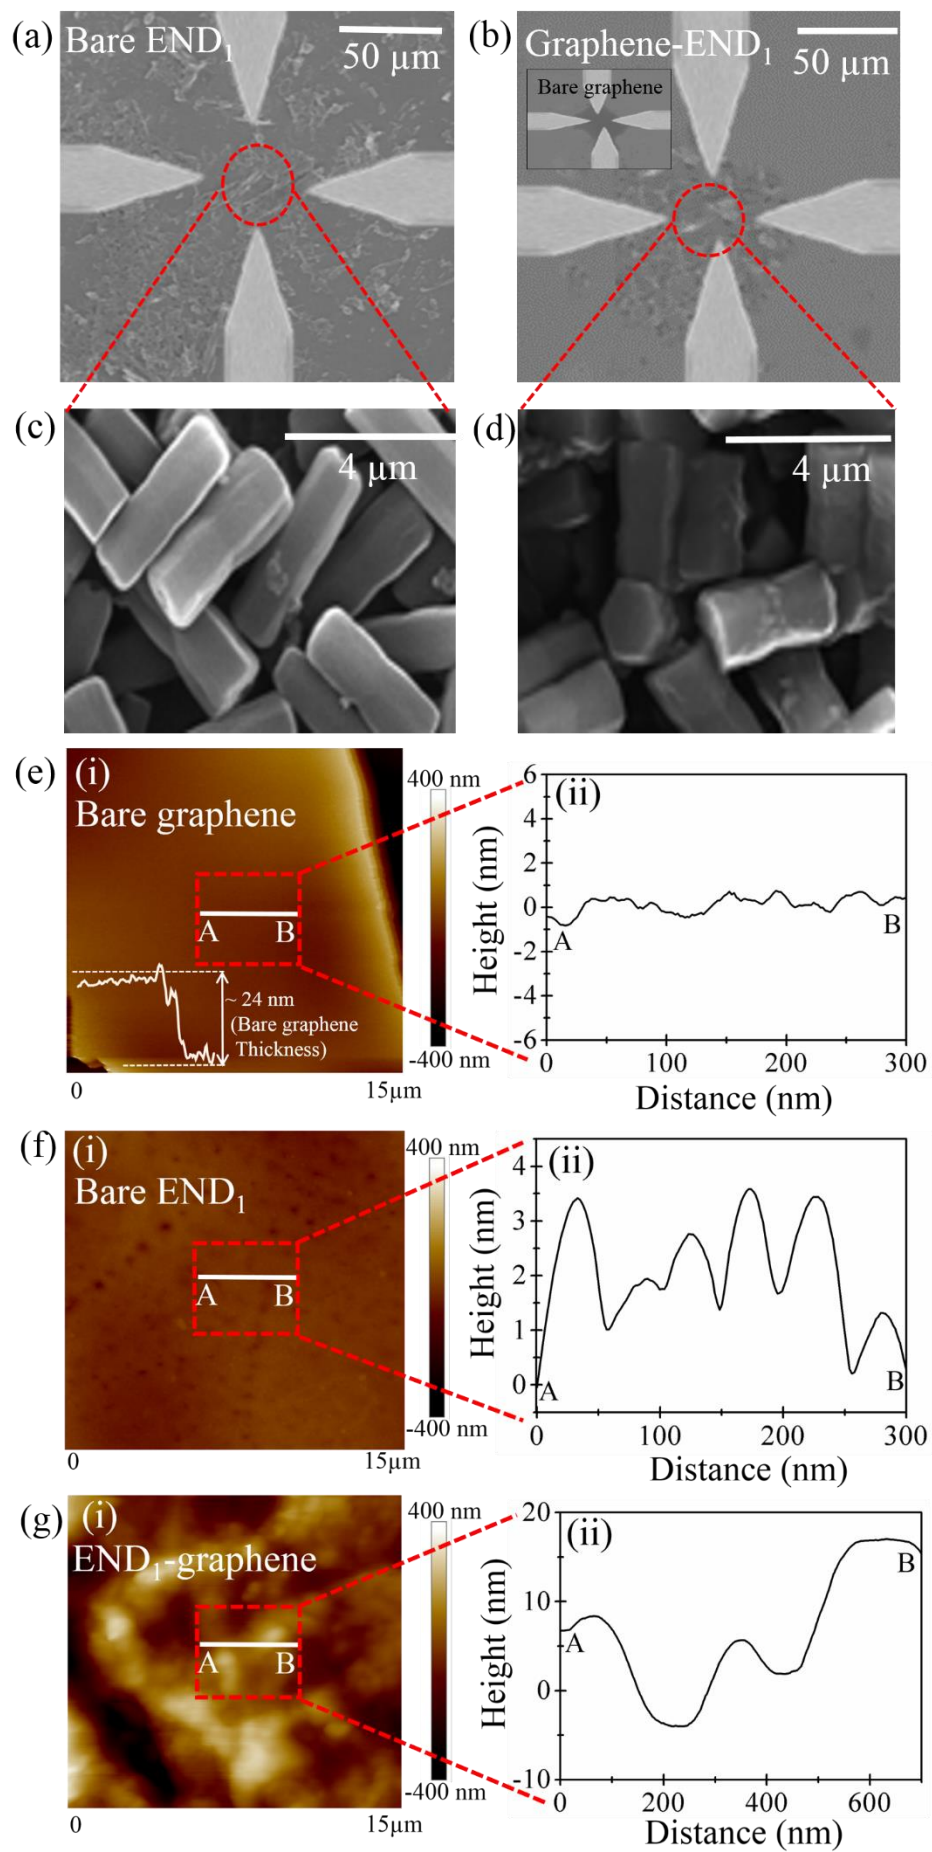

**Figure S2:** Low-magnification SEM images of electrophoretic deposition of (a) bare END<sub>1</sub>, (b) END<sub>1</sub>-graphene hybrid (inset shows the SEM of bare graphene). High-magnification SEM images showing (c) the micron-sized hexagonal END<sub>1</sub> rods with an average length of  $\sim 4 \mu\text{m}$ , and (d) the aggregation of END<sub>1</sub> on top of the graphene membrane after electrophoretic deposition. (e)-(g): (i) Large-area AFM scan ( $\sim 15 \mu\text{m} \times 15 \mu\text{m}$ ), and (ii) shows the height profile of the A-to-B scan direction. The image in (e)-(i) reveals a uniform, smooth graphene surface, where the bottom left inset shows the bare graphene thickness to be  $\sim 24 \text{ nm}$  thickness. (f)-(i)-(ii) illustrate the clusters of bare END<sub>1</sub> in the form of islands with a peak height of  $\sim 3.6 \text{ nm}$  and diameter of  $\sim 50 \text{ nm}$ ; (g)-(i)-(ii) reveal the clustering of END<sub>1</sub> on the graphene surface in the form of islands with peak height of  $\sim 9\text{-}20 \text{ nm}$  and diameter of  $\sim 200\text{-}350 \text{ nm}$ .

### Electrophoretic Deposition of END<sub>2</sub>

Before the preparation of the END<sub>2</sub>-graphene hybrid devices, initial measurements were conducted on the bare END<sub>2</sub> to measure the intrinsic conductance of these endohedrals, where  $\sim 0.1$ ,  $\sim 0.2$ , and  $\sim 0.3 \text{ mg}$  of END<sub>2</sub> was dissolved in  $\sim 1 \text{ mL}$  of o-DCB. Electrophoretic deposition was used to adhere END<sub>2</sub> on the substrate, similar to the technique reported for depositing C<sub>60</sub> films,<sup>[3]</sup> where the current  $I$  as a function of the electrophoretic deposition time  $t$  is shown in Figure S3(a). A drop of the suspension was injected at voltage  $V \sim 0 \text{ V}$  and a step potential was applied from  $\sim 0.05 \text{ V}$  to  $\sim 0.3 \text{ V}$  in  $\sim 0.05 \text{ V}$  increments between the electrodes.

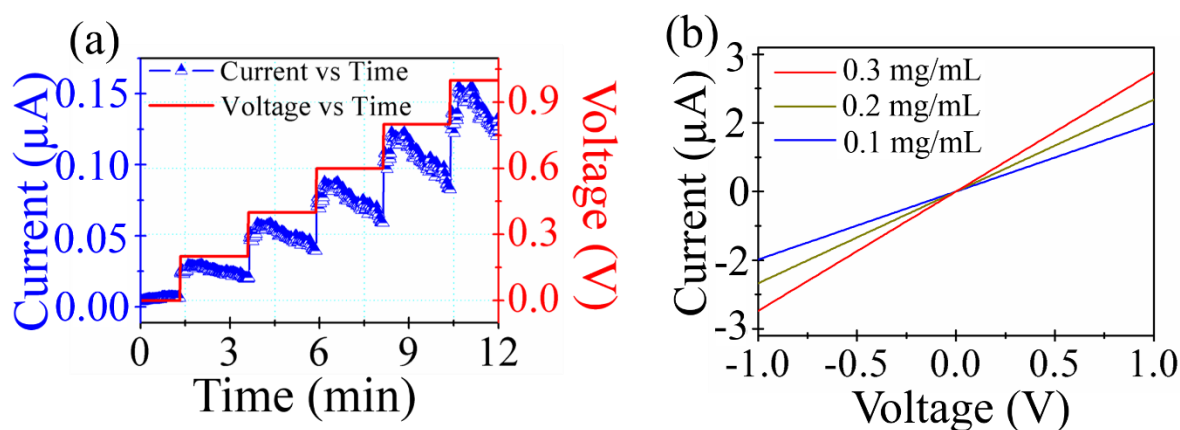

**Figure S3:** (a) Current measurements as a function of electrophoretic deposition time for END<sub>2</sub>. (b)  $I$ - $V$  Characteristic of END<sub>2</sub> at various concentrations in o-DCB.

The electrophoretic deposition  $I$  increased gradually as the step-potential increased with time for END<sub>2</sub>. Upon saturation for a particular step  $V$ ,  $I$  starts to decrease due to Joule heating as the resistance increases. After  $t \sim 12$  min of deposition, a film of END<sub>1</sub> adhered on top of the Au/Ti electrodes. Eventually, the device was vacuum annealed for  $\sim 24$  hours at  $\sim 180^\circ\text{C}$  to drive off the residual solvents (i.e. at the approximate boiling temperature of o-DCB). The  $I$ - $V$  Characteristic of bare END<sub>2</sub> films deposited on SiO<sub>2</sub>/Si substrates for concentrations  $\sim 0.1$  mg/mL,  $\sim 0.2$  mg/mL and  $\sim 0.3$  mg/mL under vacuum conditions are shown in Figure S3(b) from  $\sim -1$  V to  $\sim 1$  V. Since the  $\sim 0.3$  mg/mL concentration of END<sub>2</sub> yielded the highest  $I$  values in o-DCB, this concentration was used to electrophoretically deposit the END<sub>2</sub> on top of the graphene membrane.

### **AFM Imaging of END<sub>2</sub>**

Figures S4(a) and (b) show the representative AFM images of the bare END<sub>2</sub> and END<sub>2</sub>-graphene hybrid at a scan speed of  $\sim 1$  Hz. The height profile of the region with the END<sub>2</sub> clusters was performed using AFM analysis, where the  $\sim 15\ \mu\text{m} \times 15\ \mu\text{m}$  scan area is shown in Figure S4(a)-(i), over the A to B scan direction as illustrated in Figure S4(a)-(ii), where the bare graphene AFM scan profile height was  $\sim 12.8$  nm. Figure S4(a)(i)-(ii) illustrate the clusters of bare END<sub>2</sub> in the form of islands exhibiting a height of  $\sim 35$ - $40$  nm and diameter  $\sim 170$ - $250$  nm; the cluster arrangement for END<sub>2</sub> on graphene is seen in Figure S4(b)(i)-(ii), which reveals a height  $\sim 45$ - $55$  nm and diameter  $\sim 184$ - $240$  nm for the clusters.

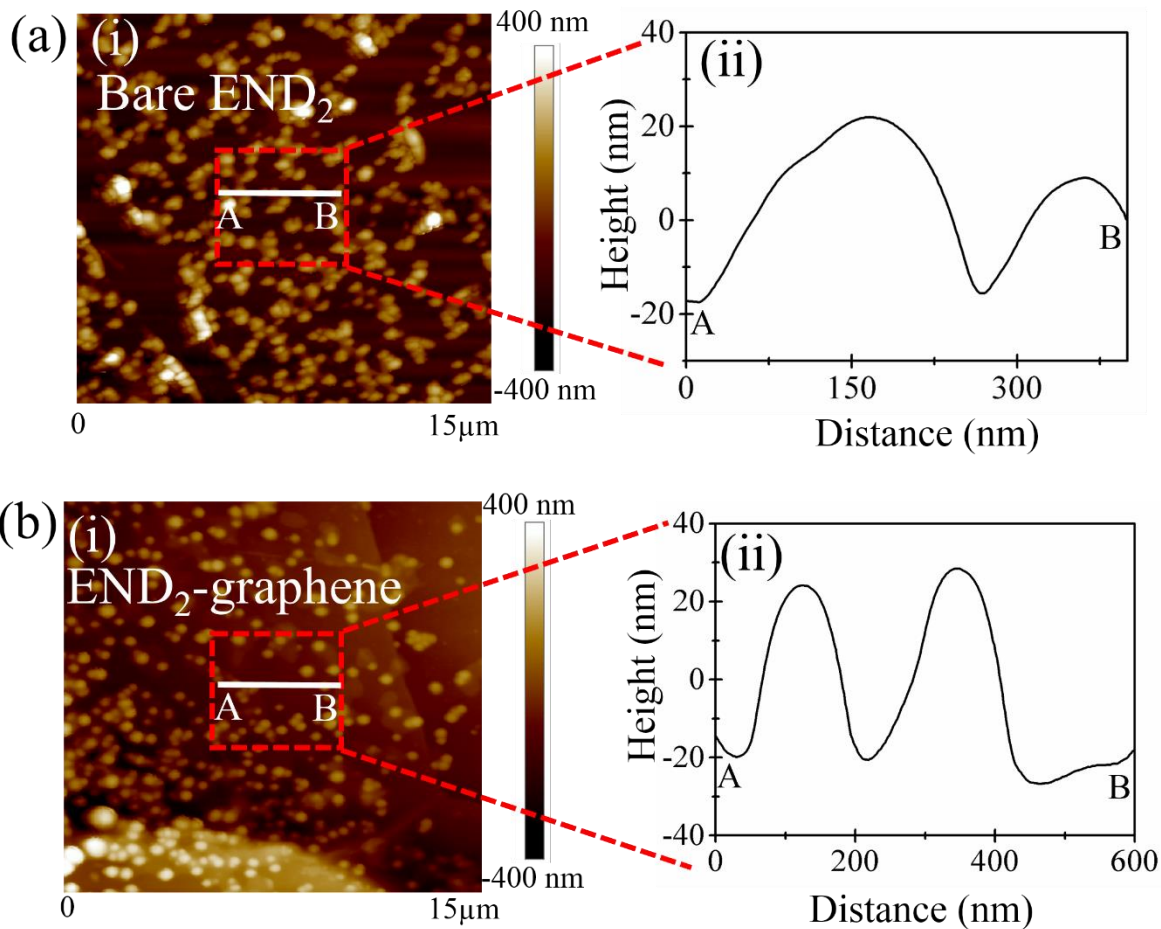

**Figure S4:** (a) and (b): (i) Large-area ( $\sim 15\ \mu\text{m} \times 15\ \mu\text{m}$ ) AFM scan and (ii) illustrates the clusters of bare  $\text{END}_2$  in the form of islands with a height of  $\sim 35\text{-}40\ \text{nm}$  and diameter  $\sim 170\text{-}250\ \text{nm}$  in the A-to-B scan direction; (b)(i)-(ii) reveals the clustering of  $\text{END}_2$  on the graphene surface in the form of islands  $\sim 45\text{-}55\ \text{nm}$  and diameter  $\sim 184\text{-}240\ \text{nm}$  in diameter. The height of the bare graphene was measured to be  $\sim 12.8\ \text{nm}$  using AFM.

## REFERENCES

- [1] M. N. Chaur, F. Melin, A. L. Ortiz, L. Echegoyen, *Angew. Chemie - Int. Ed.* **2009**, 48, 7514.
- [2] Y. Xu, J. Guo, T. Wei, X. Chen, Q. Yang, S. Yang, *Nanoscale* **2013**, 5, 1993.
- [3] P. V Kamat, S. Barazzouk, K. G. Thomas, S. Hotchandani, *J. Phys. Chem. B* **2000**, 104, 4014.
